# Supplementary material
Source: MDPI journal article supplement (https://www.mdpi.com/2039-4403/12/2/39)
Supplement: s1 [file s1]

**Supplementary Table S1.** Older participants' characteristics.

| Older adult ID | Age | Sex | Marital status | Length of hospital stay (days) | Number ICD-10 | Number of medications | Principal ICD-10 diagnosis for hospitalisation                            |
|----------------|-----|-----|----------------|--------------------------------|---------------|-----------------------|---------------------------------------------------------------------------|
| OA01           | 92  | F   | widow          | 6                              | 7             | 12                    | M80.88 Other osteoporosis with current pathological fracture, vertebra(e) |
| OA02           | 66  | M   | married        | 112                            | 27            | 21                    | B25.80 Cytomegaloviral disease of the digestive system                    |
| OA03           | 73  | F   | married        | 39                             | 12            | 8                     | C16.3 Malignant tumour: pyloric antrum                                    |
| OA04           | 82  | F   | divorced       | 20                             | 25            | 14                    | S70.0 Contusion of hip                                                    |
| OA05           | 71  | F   | widow          | 60                             | 12            | 6                     | K92.1 Melaena                                                             |
| OA06           | 86  | M   | married        | 14                             | 10            | 9                     | J18.0 Bronchopneumonia, unspecified                                       |
| OA07           | 94  | F   | widow          | 12                             | 10            | 8                     | I50.01 Right ventricular failure (secondary to left heart failure)        |
| OA08           | 73  | F   | widow          | 12                             | 3             | 10                    | N30.0 Acute cystitis                                                      |
| OA09           | 83  | F   | widow          | 37                             | 14            | 8                     | T84.04 Mechanical complication of internal joint prosthesis: hip joint    |
| OA10           | 85  | M   | widower        | 18                             | 18            | 7                     | M80.98 Unspecified osteoporosis with pathological fracture                |
| OA11           | 82  | M   | married        | 41                             | 18            | 13                    | D64.8 Other specified anaemias                                            |
| OA12           | 82  | M   | widower        | 14                             | 17            | 8                     | I50.01 Right ventricular failure (secondary to left heart failure)        |
| OA13           | 75  | M   | widower        | 14                             | 9             | 7                     | I63.0 Cerebral infarction due to thrombosis of precerebral arteries       |
| OA14           | 88  | F   | widow          | 17                             | 10            | 7                     | S22.4 Multiple fractures of ribs                                          |

|             |                                                                     |   |          |    |    |    |                                                                          |
|-------------|---------------------------------------------------------------------|---|----------|----|----|----|--------------------------------------------------------------------------|
| <b>OA15</b> | 85                                                                  | M | married  | 34 | 16 | 13 | I63.4 Cerebral infarction due to embolism of cerebral arteries           |
| <b>OA16</b> | <i>Recruited but not polymedicated at the time of the interview</i> |   |          |    |    |    |                                                                          |
| <b>OA17</b> | 87                                                                  | M | married  | 47 | 22 | 11 | K80.30 Calculus of bile duct with cholangitis                            |
| <b>OA18</b> | 86                                                                  | M | married  | 13 | 5  | 5  | I63.8 Other cerebral infarction                                          |
| <b>OA19</b> | 84                                                                  | M | married  | 5  | 9  | 6  | G45.0 Vertebrobasilar artery syndrome                                    |
| <b>OA20</b> | 69                                                                  | M | divorced | 13 | 14 | 13 | I74.3 Embolism and thrombosis of arteries of lower extremities           |
| <b>OA21</b> | 75                                                                  | F | married  | 13 | 16 | 6  | R26.8 Other and unspecified abnormalities of gait and mobility           |
| <b>OA22</b> | 83                                                                  | F | widow    | 8  | 5  | 7  | J13 Pneumonia due to Streptococcus pneumoniae                            |
| <b>OA23</b> | 87                                                                  | F | widow    | 5  | 8  | 11 | A08.1 Acute gastroenteropathy due to Norwalk agent                       |
| <b>OA24</b> | 74                                                                  | M | married  | 8  | 13 | 9  | J18.1 Lobar pneumonia, unspecified                                       |
| <b>OA25</b> | 88                                                                  | M | married  | 12 | 18 | 7  | I50.01 Left ventricular failure                                          |
| <b>OA26</b> | 76                                                                  | M | married  | 1  | 4  | 4  | C22.0 Liver cell carcinoma                                               |
| <b>OA27</b> | 77                                                                  | M | married  | 12 | 11 | 8  | C20 Malignant neoplasm of rectum                                         |
| <b>OA28</b> | 89                                                                  | M | widower  | 14 | 9  | 14 | K56.5 Intestinal adhesions [bands] with obstruction (post-infection)     |
| <b>OA29</b> | 81                                                                  | M | married  | 4  | 9  | 8  | K80.20 Calculus of gallbladder without cholecystitis without obstruction |
