# Supplementary material
Source: MDPI journal article supplement (https://www.mdpi.com/2039-4403/12/2/39)
Supplement: s1 [file s1]

**Supplementary Table S2:** Informal and professional caregivers' characteristics.

| Older adult ID | Informal caregiver ID                 | Age | Sex | Relationship    | Healthcare Professional ID            | Profession         | Age | Sex |
|----------------|---------------------------------------|-----|-----|-----------------|---------------------------------------|--------------------|-----|-----|
| OA01           | IC01a                                 | 59  | F   | Daughter        | Prof01a                               | Pharmacist         | 40  | F   |
|                | IC01b                                 | 67  | F   | Daughter        | Prof01b                               | Pharmacy assistant | 28  | F   |
| OA02           | IC02                                  | 58  | F   | Wife            | No designated healthcare professional |                    |     |     |
| OA03           | IC03                                  | 71  | M   | Husband         | Prof03                                | Nurse              | 30  | F   |
| OA04           | IC04                                  | 54  | F   | Daughter        | Prof04                                | Nurse              | 43  | F   |
| OA05           | Not involved in medication management |     |     |                 | No designated healthcare professional |                    |     |     |
| OA06           | Refused to participate                |     |     |                 | No designated healthcare professional |                    |     |     |
| OA07           | IC07                                  | 52  | F   | Daughter-in-law | Prof07                                | Nurse              | 31  | M   |
| OA08           | IC08                                  | 55  | F   | Daughter        | Prof08                                | Pharmacist         | 56  | F   |
| OA09           | Not involved in medication management |     |     |                 | No designated healthcare professional |                    |     |     |
| OA10           | Not involved in medication management |     |     |                 | Refused to participate                |                    |     |     |
| OA11           | IC11                                  | 57  | F   | Wife            | Refused to participate                |                    |     |     |
| OA12           | IC12                                  | 48  | F   | Daughter        | No designated healthcare professional |                    |     |     |
| OA13           | Not involved in medication management |     |     |                 | Refused to participate                |                    |     |     |

|             |                                       |    |   |          |                                       |            |    |   |
|-------------|---------------------------------------|----|---|----------|---------------------------------------|------------|----|---|
| <b>OA14</b> | Refused to participate                |    |   |          | No designated healthcare professional |            |    |   |
| <b>OA15</b> | IC15                                  | 84 | F | Wife     | Prof15                                | Nurse      | 58 | F |
| <b>OA17</b> | IC17a                                 | 85 | F | Wife     | Prof17                                | GP         | 54 | F |
|             | IC17b                                 | 52 | F | Daughter |                                       |            |    |   |
| <b>OA18</b> | IC18                                  | 86 | F | Wife     | Prof18                                | Pharmacist | 54 | M |
| <b>OA19</b> | Refused to participate                |    |   |          | No designated healthcare professional |            |    |   |
| <b>OA20</b> | Refused to participate                |    |   |          | Prof20                                | Nurse      | 46 | F |
| <b>OA21</b> | IC21                                  | 80 | M | Husband  | Prof21                                | GP         | 39 | M |
| <b>OA22</b> | Not involved in medication management |    |   |          | Refused to participate                |            |    |   |
| <b>OA23</b> | Not involved in medication management |    |   |          | No designated healthcare professional |            |    |   |
| <b>OA24</b> | Not involved in medication management |    |   |          | Refused to participate                |            |    |   |
| <b>OA25</b> | IC25                                  | 76 | F | Wife     | Unreachable                           |            |    |   |
| <b>OA26</b> | IC26                                  | 75 | F | Wife     | No designated healthcare professional |            |    |   |
| <b>OA27</b> | IC27                                  | 80 | F | Wife     | Unreachable                           |            |    |   |
| <b>OA28</b> | Not involved in medication management |    |   |          | Prof28                                | GP         | ?  | F |
| <b>OA29</b> | Not involved in medication management |    |   |          | Prof29                                | Oncologist | 47 | F |
