# Supplementary material
Source: MDPI journal article supplement (https://www.mdpi.com/2039-4403/12/2/39)

**Supplementary Figure S1.** Description of the enrolment process.

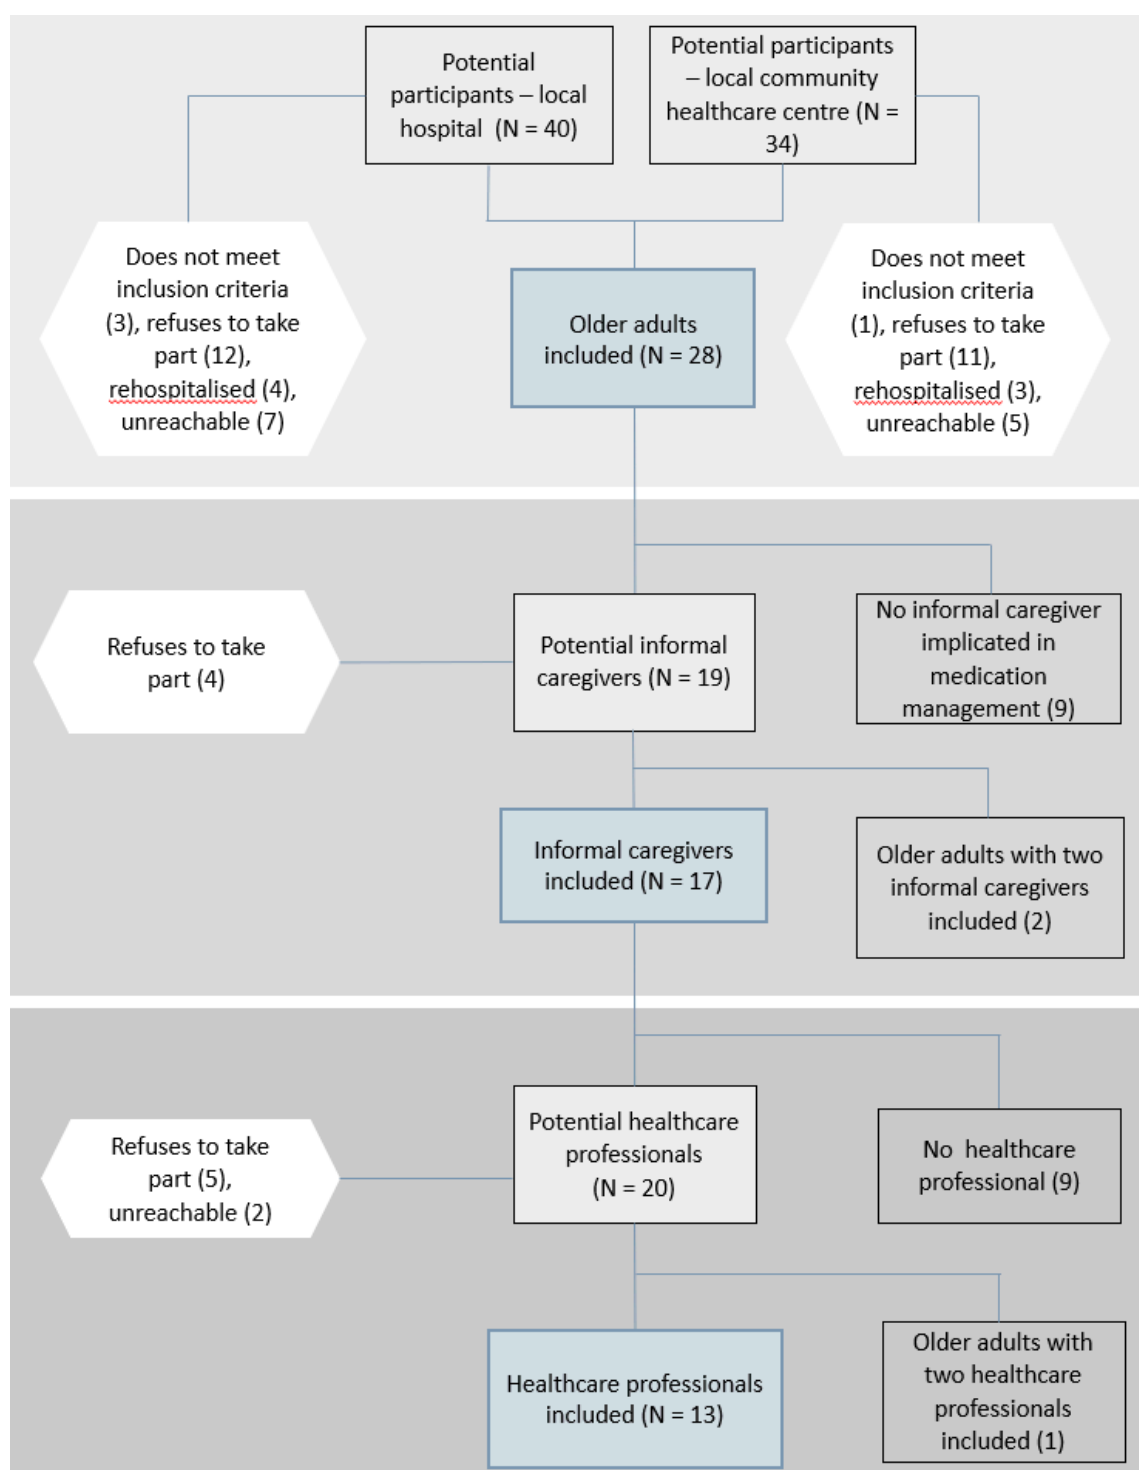

Supplement: s1 [file s1]
